# Supplementary material for: Protective efficacy of 6-week regimen for latent tuberculosis infection treatment in rural China: 5-year follow-up of a randomised controlled trial
Source: PubMed Central journal article supplement — Eur Respir J. 2022 Jul 7;60(1):2102359. doi: 10.1183/13993003.02359-2021 (PMC9260122; doi:10.1183/13993003.02359-2021), 2022-07-07
Supplement: ERJ-02359-2021.Supplement.pdf [file ERJ-02359-2021.Supplement.pdf]

**Supplementary Table S1 Detailed information of the active tuberculosis cases identified during 5 year follow-up**

| <b>ID</b>  | <b>Age</b> | <b>Sex</b> | <b>Group</b>            | <b>Time for diagnosis</b> | <b>Smear</b> | <b>Culture</b> | <b>Gene X-pert</b> | <b>Diagnosis</b>          |
|------------|------------|------------|-------------------------|---------------------------|--------------|----------------|--------------------|---------------------------|
| 1201020181 | 59         | male       | Untreated control group | Nov-17                    | negative     | negative       | negative           | Clinical diagnosis        |
| 3241010621 | 70         | male       | Untreated control group | Nov-17                    | negative     | negative       | negative           | Clinical diagnosis        |
| 3151030171 | 66         | female     | Untreated control group | Jun-17                    | negative     | negative       | negative           | Clinical diagnosis        |
| 1032040081 | 58         | male       | Untreated control group | Nov-17                    | negative     | negative       | negative           | Clinical diagnosis        |
| 1131020122 | 60         | female     | Untreated control group | Nov-17                    | negative     | negative       | negative           | Clinical diagnosis        |
| 1201030011 | 70         | male       | Untreated control group | Nov-17                    | negative     | negative       | negative           | Clinical diagnosis        |
| 1231040132 | 51         | female     | Untreated control group | Nov-17                    | negative     | negative       | negative           | Clinical diagnosis        |
| 3071080142 | 55         | female     | Untreated control group | Nov-17                    | negative     | negative       | negative           | Clinical diagnosis        |
| 3211040312 | 58         | male       | Untreated control group | Nov-17                    | negative     | negative       | negative           | Clinical diagnosis        |
| 3431020172 | 64         | male       | Untreated control group | Nov-17                    | negative     | negative       | negative           | Clinical diagnosis        |
| 3431050401 | 59         | female     | Untreated control group | Dec-16                    | negative     | negative       | negative           | Clinical diagnosis        |
| 4021050461 | 69         | male       | Untreated control group | Dec-16                    | negative     | negative       | negative           | Clinical diagnosis        |
| 4061030252 | 63         | male       | Untreated control group | Nov-16                    | positive     | positive       | positive           | Microbiological confirmed |
| 6044050031 | 53         | male       | Untreated control group | Nov-17                    | negative     | negative       | negative           | Clinical diagnosis        |
| 1181040172 | 64         | male       | Untreated control group | Dec-19                    | negative     | negative       | negative           | Clinical diagnosis        |
| 3063040171 | 66         | male       | Untreated control group | Dec-19                    | negative     | negative       | negative           | Clinical diagnosis        |
| 7031040361 | 65         | male       | Untreated control group | Dec-19                    | negative     | negative       | negative           | Clinical diagnosis        |
| 5081040202 | 64         | female     | Untreated control group | Apr-19                    | negative     | negative       | negative           | Clinical diagnosis        |
| 2173070321 | 64         | male       | Untreated control group | Aug-20                    | negative     | negative       | negative           | Clinical diagnosis        |
| 3251060271 | 67         | male       | Untreated control group | Aug-20                    | negative     | negative       | negative           | Clinical diagnosis        |
| 1042040381 | 66         | male       | Untreated control group | Aug-20                    | negative     | positive       | positive           | Microbiological confirmed |
| 3152060882 | 64         | male       | Untreated control group | Aug-20                    | negative     | positive       | negative           | Microbiological confirmed |
| 4141040201 | 66         | male       | Untreated control group | Aug-20                    | negative     | positive       | positive           | Microbiological confirmed |
| 5041030051 | 70         | female     | Untreated control group | Aug-20                    | negative     | positive       | positive           | Microbiological confirmed |
| 6066020021 | 61         | male       | Untreated control group | Aug-20                    | positive     | positive       | positive           | Microbiological confirmed |
| 4061030091 | 69         | male       | Untreated control group | Dec-20                    | negative     | negative       | negative           | Clinical diagnosis        |
| 1241020241 | 68         | female     | Treated group           | Nov-17                    | negative     | negative       | negative           | Clinical diagnosis        |
| 3071070301 | 67         | male       | Treated group           | May-16                    | negative     | negative       | negative           | Clinical diagnosis        |
| 3231020332 | 62         | male       | Treated group           | Oct-17                    | negative     | negative       | negative           | Clinical diagnosis        |
| 4141090242 | 69         | female     | Treated group           | Nov-17                    | negative     | negative       | negative           | Clinical diagnosis        |
| 6022040081 | 65         | female     | Treated group           | Aug-16                    | negative     | negative       | negative           | Clinical diagnosis        |
| 3301070171 | 68         | male       | Treated group           | Nov-16                    | negative     | negative       | negative           | Clinical diagnosis        |
| 5081010531 | 62         | male       | Treated group           | Sep-20                    | positive     | positive       | positive           | Microbiological confirmed |
| 1061030361 | 68         | male       | Treated group           | Dec-20                    | negative     | negative       | negative           | Microbiological confirmed |
| 3251020041 | 69         | female     | Treated group           | Dec-20                    | negative     | negative       | negative           | Clinical diagnosis        |
| 3301060042 | 66         | female     | Treated group           | Dec-20                    | negative     | negative       | negative           | Clinical diagnosis        |
| 3431010121 | 70         | male       | Treated group           | Dec-20                    | negative     | negative       | negative           | Clinical diagnosis        |
| 4131080101 | 61         | male       | Treated group           | Oct-19                    | negative     | negative       | negative           | Clinical diagnosis        |

Abbreviations: TB, tuberculosis.

**Supplementary Table S2 Characteristics of the study participants with the highest quartile baseline IFN- $\gamma$  levels included in the intention-to-treat analysis**

| Variables                            | Treated group <sup>#</sup> n (%) | Untreated control group n (%) | p for $\chi^2$ test |
|--------------------------------------|----------------------------------|-------------------------------|---------------------|
| <b>Total</b>                         | 337                              | 288                           |                     |
| <b>Age (years), n (%)</b>            |                                  |                               |                     |
| 50-55                                | 93 (27.60)                       | 62 (21.53)                    | 0.371               |
| 56-60                                | 86 (25.52)                       | 79 (27.43)                    |                     |
| 61-65                                | 84 (24.93)                       | 76 (26.39)                    |                     |
| 66-70                                | 74 (21.96)                       | 71 (24.65)                    |                     |
| <b>Gender, n (%)</b>                 |                                  |                               |                     |
| Female                               | 138 (40.95)                      | 120 (41.67)                   | 0.856               |
| Male                                 | 199 (59.05)                      | 168 (58.33)                   |                     |
| <b>BMI (Kg/m<sup>2</sup>), n (%)</b> |                                  |                               |                     |
| <18.5                                | 139 (41.25)                      | 120 (41.67)                   | 0.941               |
| 18.5–<24                             | 5 (1.48)                         | 6 (2.08)                      |                     |
| 24–<28                               | 129 (38.28)                      | 110 (38.19)                   |                     |
| ≥28                                  | 64 (18.99)                       | 52 (18.06)                    |                     |
| <b>Smoking, n (%)</b>                |                                  |                               |                     |
| Never smoked                         | 186 (55.19)                      | 158 (54.86)                   | 0.934               |
| Ever smoked                          | 151 (44.81)                      | 130 (45.14)                   |                     |
| <b>Presence of TB history, n (%)</b> |                                  |                               |                     |
| No                                   | 333 (98.81)                      | 277 (96.18)                   | <b>0.032</b>        |
| Yes                                  | 4 (1.19)                         | 11 (3.82)                     |                     |
| <b>Alcohol drinking, n (%)</b>       |                                  |                               |                     |
| No                                   | 231 (68.55)                      | 194 (67.36)                   | 0.752               |
| Yes                                  | 106 (31.45)                      | 94 (32.64)                    |                     |
| <b>Fasting blood glucose, n (%)</b>  |                                  |                               |                     |
| ≤7 mmol·L <sup>-1</sup>              | 314 (93.18)                      | 264 (91.67)                   | 0.476               |
| >7 mmol·L <sup>-1</sup>              | 23 (6.82)                        | 24 (8.33)                     |                     |
| <b>History of silicosis, n (%)</b>   |                                  |                               |                     |
| No                                   | 331 (98.22)                      | 280 (97.22)                   | 0.401               |
| Yes                                  | 6 (1.78)                         | 8 (2.78)                      |                     |

Abbreviations: BMI, body mass index; TB, tuberculosis.

<sup>#</sup>: Treated group completed 6 weeks of twice-weekly rifapentine plus isoniazid (both with a maximum dose of 600 mg).

**Supplementary Table S3 Characteristics of active tuberculosis and non-tuberculosis participants with the highest quartile baseline IFN- $\gamma$  levels**

| Variables                                 | Active TB   | Non-TB      | p for $\chi^2$ test |
|-------------------------------------------|-------------|-------------|---------------------|
| <b>Age (years), n (%)</b>                 |             |             |                     |
| 50-55                                     | 0 (0.00)    | 155 (25.24) | 0.078               |
| 56-60                                     | 2 (18.18)   | 163 (26.55) |                     |
| 61-65                                     | 6 (54.55)   | 154 (25.08) |                     |
| 66-70                                     | 3 (27.27)   | 142 (23.13) |                     |
| <b>Gender, n (%)</b>                      |             |             |                     |
| Female                                    | 2 (18.18)   | 256 (41.69) | 0.116               |
| Male                                      | 9 (81.82)   | 358 (58.31) |                     |
| <b>BMI (Kg/m<sup>2</sup>), n (%)</b>      |             |             |                     |
| <18.5                                     | 1 (9.09)    | 10 (1.63)   | <b>0.025</b>        |
| 18.5–<24                                  | 8 (72.73)   | 251 (40.88) |                     |
| 24–<28                                    | 2 (18.18)   | 237 (38.60) |                     |
| $\geq$ 28                                 | 0 (0.00)    | 116 (18.89) |                     |
| <b>Ever-smoker, n (%)</b>                 |             |             |                     |
| No                                        | 3 (27.27)   | 341 (55.54) | 0.062               |
| Yes                                       | 8 (72.73)   | 273 (44.46) |                     |
| <b>Current alcohol drinking, n (%)</b>    |             |             |                     |
| No                                        | 6 (54.55)   | 419 (68.24) | 0.335               |
| Yes                                       | 5 (45.45)   | 195 (31.76) |                     |
| <b>With a history of silicosis, n (%)</b> |             |             |                     |
| No                                        | 10 (90.91)  | 601 (97.88) | 0.121               |
| Yes                                       | 1 (9.09)    | 14 (2.12)   |                     |
| <b>CXR identified prior TB, n (%)</b>     |             |             |                     |
| No                                        | 9 (81.82)   | 601 (97.88) | <b>&lt;0.001</b>    |
| Yes                                       | 2 (18.18)   | 13 (2.12)   |                     |
| <b>Fasting blood glucose, n (%)</b>       |             |             |                     |
| $\leq$ 7 mmol/L                           | 11 (100.00) | 567 (92.35) | 0.340               |
| >7 mmol/L                                 | 0 (0.00)    | 47 (7.65)   |                     |
| <b>Groups, n (%)</b>                      |             |             |                     |
| Treated group                             | 2 (18.18)   | 335 (54.56) | <b>0.016</b>        |
| Untreated control group                   | 9 (81.82)   | 279 (45.44) |                     |

Abbreviations: BMI, Body mass index; CI, confidence interval; CXR, chest radiography; HR, hazard ratio; TB, tuberculosis.

**Supplementary Table S4 Subgroup analysis of incidence of active tuberculosis according to median baseline IFN- $\gamma$  and timing of tuberculosis occurrence**

| <b>Treated group<sup>#</sup></b>                                    |                                            |                                           |                                                   |
|---------------------------------------------------------------------|--------------------------------------------|-------------------------------------------|---------------------------------------------------|
|                                                                     | <b>The first 2-year after intervention</b> | <b>The last 3-year after intervention</b> | <b>p for <math>\chi^2</math> test<sup>+</sup></b> |
| <b>Baseline IFN-<math>\gamma</math> &lt;1.34 IU/mL</b>              | 0.08 (2/2471) /100 person-years            | 0.06 (2/3405) /100 person-years           | 1.000                                             |
| <b>Baseline IFN-<math>\gamma</math> <math>\geq</math>1.34 IU/mL</b> | 0.16 (4/2471) /100 person-years            | 0.12 (4/3405) /100 person-years           | 0.922                                             |
| <b>p for <math>\chi^2</math> test<sup>§</sup></b>                   | 0.683                                      | 0.683                                     |                                                   |
| <b>Untreated control group</b>                                      |                                            |                                           |                                                   |
|                                                                     | <b>The first 2-year after intervention</b> | <b>The last 3-year after intervention</b> | <b>p for <math>\chi^2</math> test<sup>+</sup></b> |
| <b>Baseline IFN-<math>\gamma</math> &lt;1.34 IU/mL</b>              | 0.19 (4/2057) /100 person-years            | 0.27 (9/3280) /100 person-years           | 0.564                                             |
| <b>Baseline IFN-<math>\gamma</math> <math>\geq</math>1.34 IU/mL</b> | 0.19 (4/2057) /100 person-years            | 0.24 (8/3280) /100 person-years           | 0.941                                             |
| <b>p for <math>\chi^2</math> test<sup>§</sup></b>                   | 1.000                                      | 0.808                                     |                                                   |

Abbreviations: TB, tuberculosis;

<sup>#</sup>: Treated group completed 6 weeks of twice-weekly rifapentine plus isoniazid (both with a maximum dose of 600 mg);

<sup>+</sup>: p value of incidence of active TB according to timing of TB occurrence;

<sup>§</sup>: p value of incidence of active TB according to median baseline IFN- $\gamma$ ;

**Supplementary Table S5 Incidence of active tuberculosis after excluding those with prior tuberculosis and diabetes mellitus**

|                                              | <b>Treated group<sup>#</sup></b> | <b>Untreated control group</b> |
|----------------------------------------------|----------------------------------|--------------------------------|
| <b>Intention-to-treat analysis</b>           |                                  |                                |
| Subjects, n                                  | 1197                             | 1023                           |
| Person-years, n                              | 5433                             | 4753                           |
| Incident cases, n                            | 11                               | 19                             |
| Cumulative incidence, % (95% CI)             | 0.92 (0.38, 1.45)                | 1.86 (1.03, 2.68)              |
| Protective rate <sup>+</sup> , %             | 50.54                            |                                |
| Incidence rate per 100 person-years (95% CI) | 0.20 (0.08, 0.32)                | 0.40 (0.22, 0.58)              |
| Protective rate <sup>§</sup> , %             | 50.00                            |                                |
| <b>Per-protocol analysis</b>                 |                                  |                                |
| Subjects, n                                  | 935                              | 1023                           |
| Person-years, n                              | 4312                             | 4753                           |
| Incident cases, n                            | 8                                | 19                             |
| Cumulative incidence, % (95% CI)             | 0.86 (0.27, 1.45)                | 1.86 (1.03, 2.68)              |
| Protective rate <sup>+</sup> , %             | 53.76                            |                                |
| Incidence rate per 100 person-years (95% CI) | 0.19 (0.06, 0.31)                | 0.40 (0.22, 0.58)              |
| Protective rate <sup>§</sup> , %             | 52.50                            |                                |

Abbreviations: TB, tuberculosis; CI, confidence interval.

<sup>#</sup>: Treated group completed 6 weeks of twice-weekly rifapentine plus isoniazid (both with a maximum dose of 600 mg);

<sup>+</sup>: calculating protective rate by using cumulative incidence;

<sup>§</sup>: calculating protective rate by using incidence rate per 100 person-years.
